# Supplementary material for: Green-synthesized zinc oxide nanoparticles, anti-Alzheimer potential and the metabolic profiling of Sabal blackburniana grown in Egypt supported by molecular modelling
Source: PubMed Central journal article supplement — RSC Adv. 2021 May 18;11(29):18009–25. doi: 10.1039/d1ra01725j (PMC9033216; doi:10.1039/d1ra01725j), 2021-05-18
Supplement: RA-011-D1RA01725J-s001.pdf [file RA-011-D1RA01725J-s001.pdf]

## The supplementary material and Supporting information

### **Green synthesized Zinc Oxide Nanoparticles, Anti-Alzheimer Potential and Metabolic Profiling of *Sabal blackburniana* grown in Egypt supported by molecular modelling**

Fig.S1. UV-Visible spectrum of the synthesized ZnO NPs using A(Leaves), B(Fruits)and, C (pollen grains) of the selected *Sabal* species.

Fig.S2. FTIR spectra of *S. blackburniana* extracts; leaves (A), and green synthesized ZnO nanoparticles using leaves (B).

Fig.S3 .IR spectra of *S. blackburniana* extracts; fruits (C) and green synthesized ZnO nanoparticles using fruits (D).

Fig.S4. FTIR spectra of *S. blackburniana* extracts; pollen grains (E) and green synthesized ZnO nanoparticles using pollen grains (F).

Table (S1): List of secondary metabolites annotated from the extracts of the selected *Sabal* species.

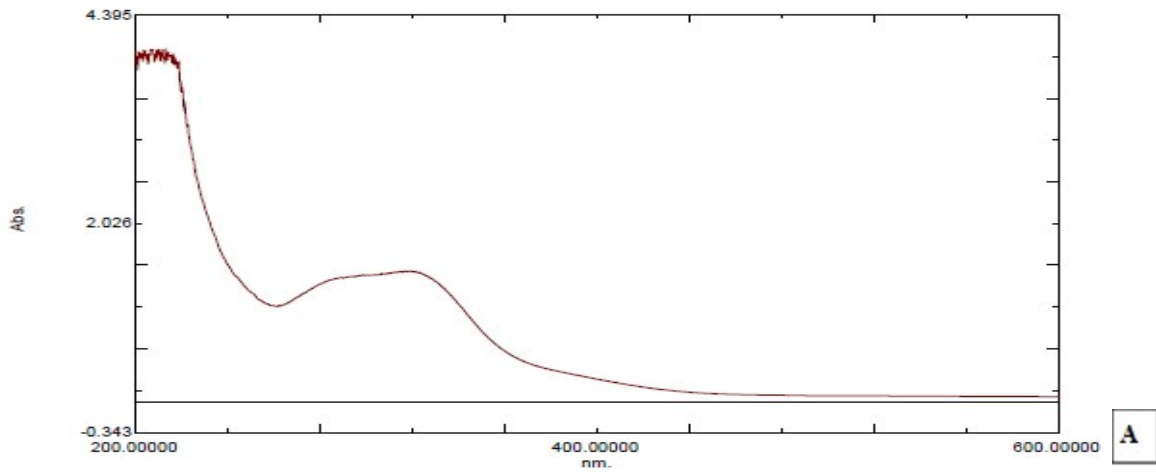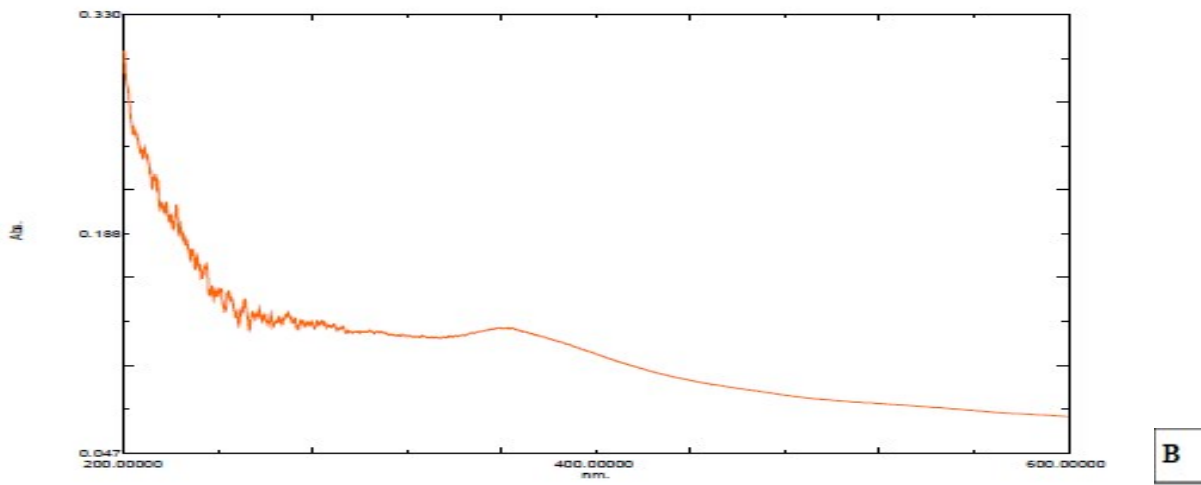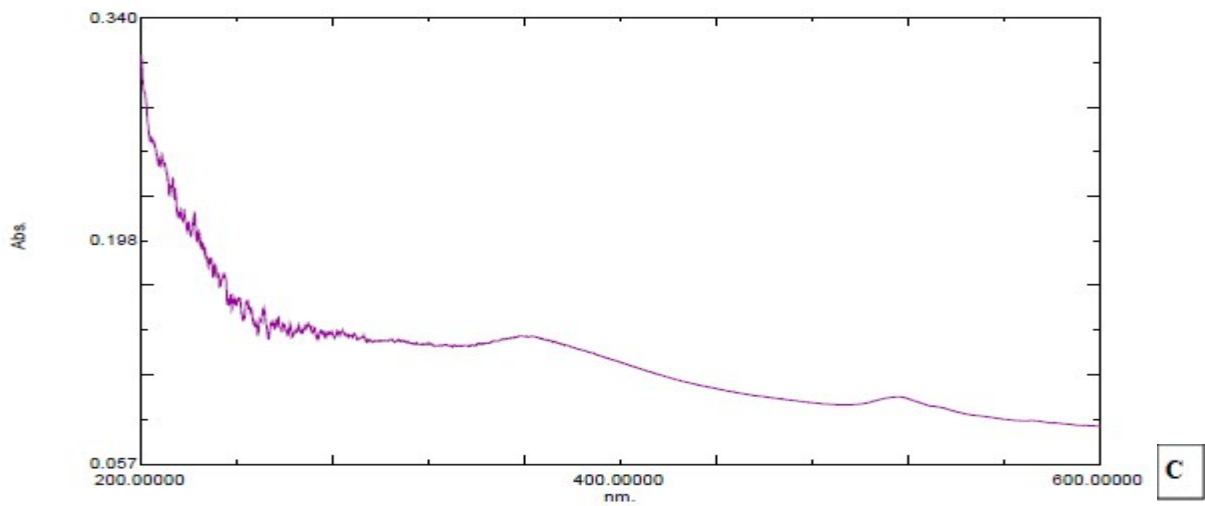

Fig.S1. UV-Visible spectrum of the synthesized ZnO NPs using A(Leaves), B(Fruits)and, C (pollen grains) of the selected *Sabal* species.

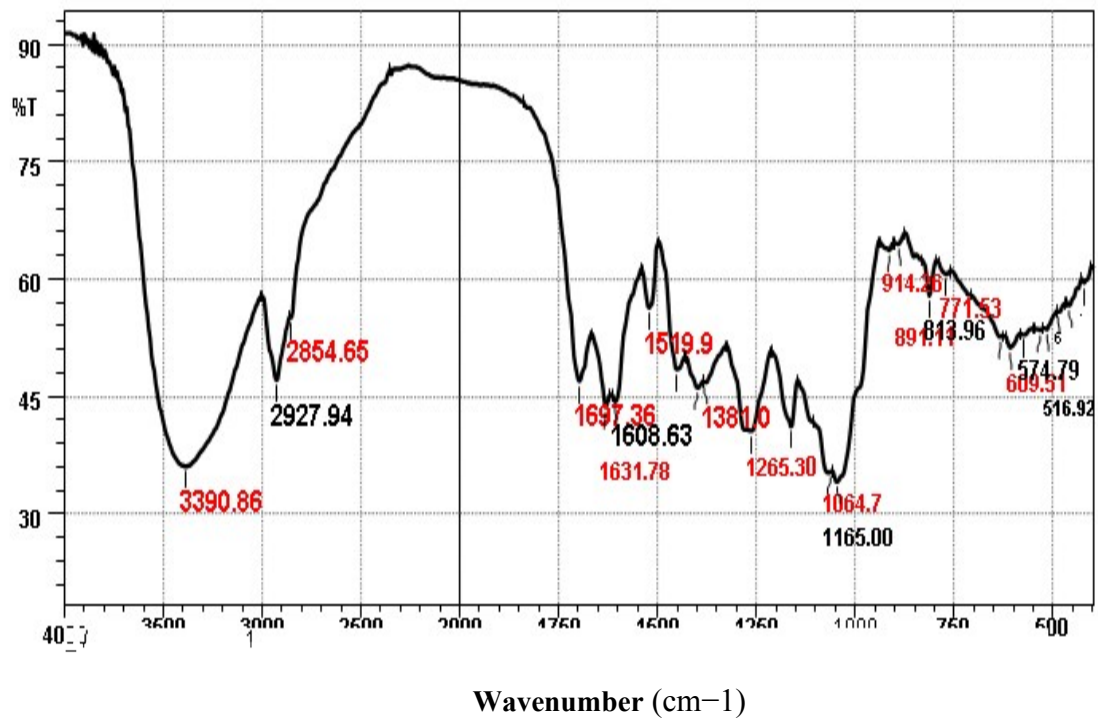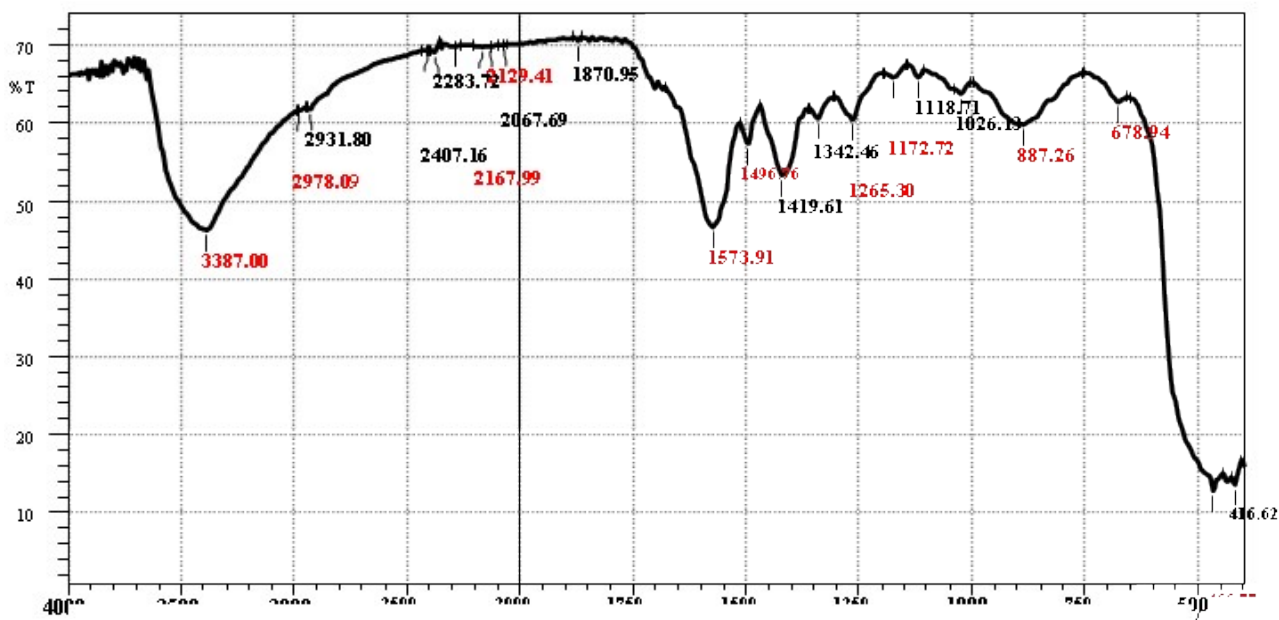

Fig.S2. FTIR spectra of *S. Blackburniana* extracts; leaves (A), and green synthesized ZnO nanoparticles using leaves (B) .

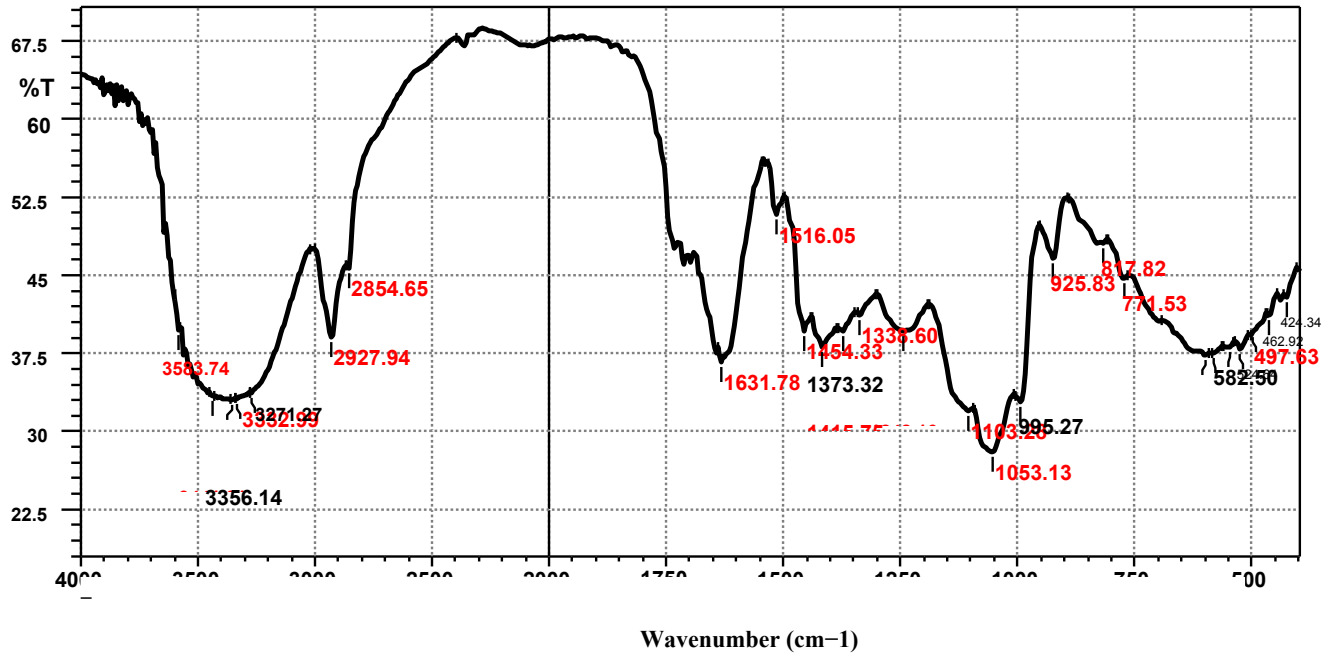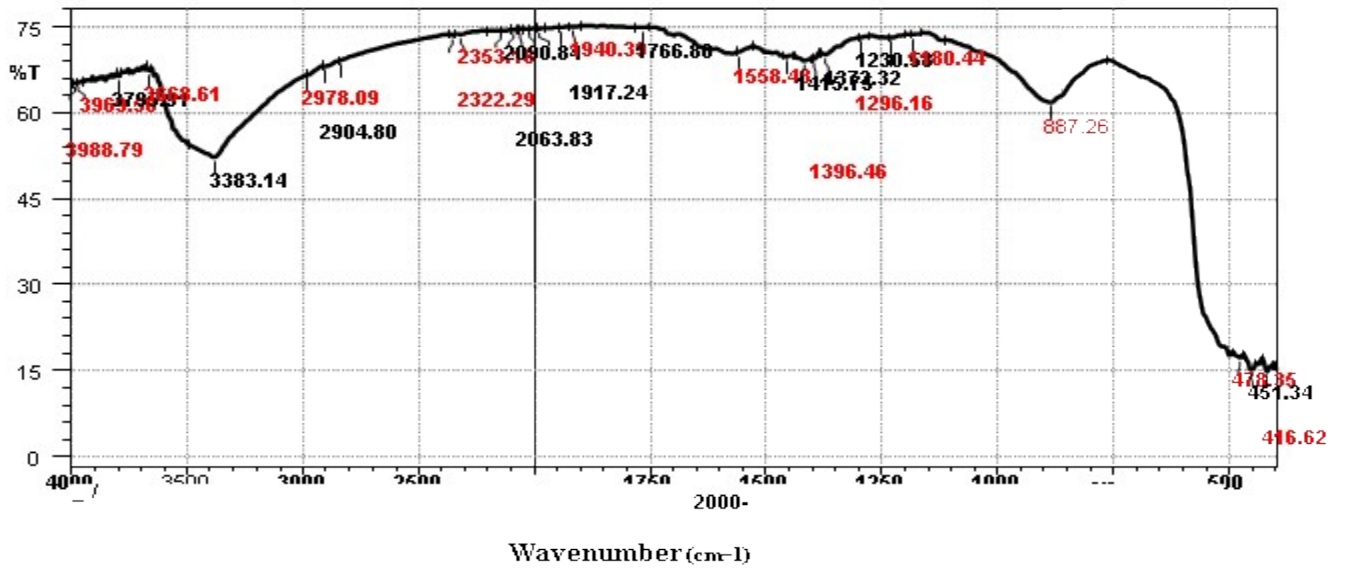

D

Fig.S3 .IR spectra of *S. Blackburniana* extracts; fruits (C) and green synthesized ZnO nanoparticles using fruits (D).

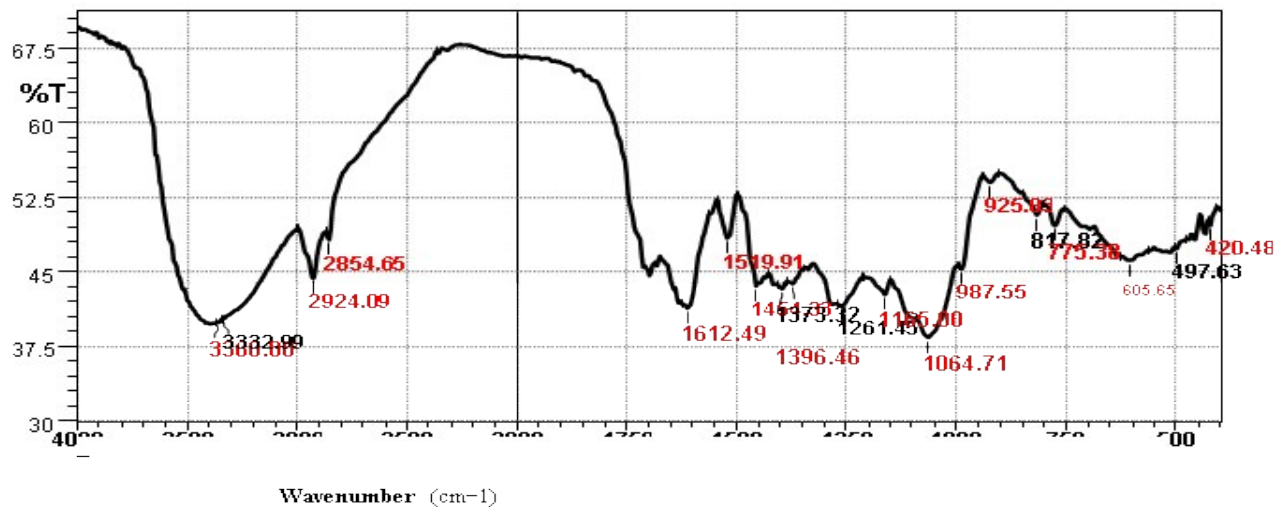

E

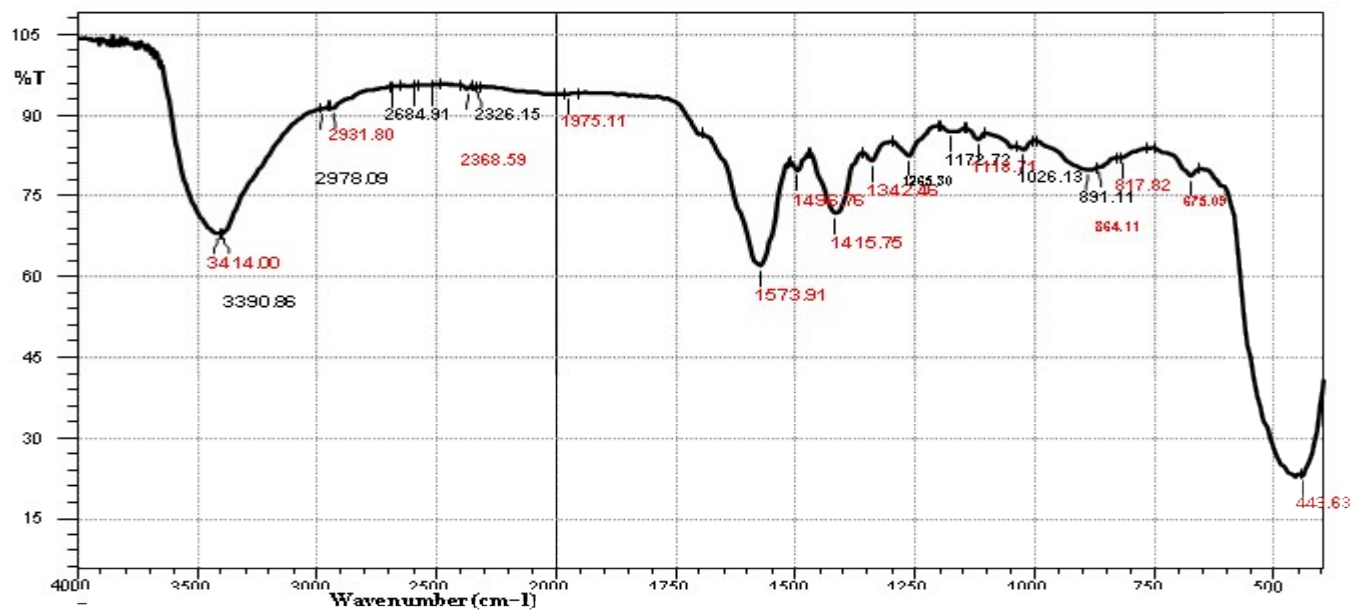

F

Fig.S4. FTIR spectra of *S. Blackburniana* extracts; pollen grains (E) and green synthesized ZnO nanoparticles using pollen grains (F) .

Table (S1): List of secondary metabolites annotated from the extracts of the selected *Sabal* species.

| No | Rt   | m/z±     | Compound                              | Molecular Formula                                             | Accurate mass | Chemical class                       | Source                                    | Reference |
|----|------|----------|---------------------------------------|---------------------------------------------------------------|---------------|--------------------------------------|-------------------------------------------|-----------|
| 1  | 2.84 | 149.1278 | Cinnamic acid                         | C <sub>9</sub> H <sub>8</sub> O <sub>2</sub>                  | 148.1205      | Phenolic acids;<br>Phenyl propanoids | Plam seeds<br>fruits                      | 1         |
| 2  | 2.32 | 155.1043 | Protocatechuic acid                   | C <sub>7</sub> H <sub>6</sub> O <sub>4</sub>                  | 154.097       | Phenolic acids                       | <i>Phoenix<br/>dactylifera</i>            | 2         |
| 3  | 2.93 | 163.0739 | Metanicotine                          | C <sub>10</sub> H <sub>14</sub> N <sub>2</sub>                | 162.067       | Alkaloid                             | <i>Duboisia<br/>Hopwoodii</i>             | 3         |
| 4  | 1.78 | 165.09   | <i>p</i> -Coumaric acid               | C <sub>9</sub> H <sub>8</sub> O <sub>3</sub>                  | 164.083       | Phenolic acids                       | Plam seeds<br>fruits                      | 4         |
| 5  | 4.64 | 171.1018 | Gallic acid                           | C <sub>7</sub> H <sub>6</sub> O <sub>5</sub>                  | 170.0945      | Phenolic acids                       | <i>Phoenix<br/>dactylifera</i>            | 5         |
| 6  | 3.93 | 195.18   | Ferulic acid                          | C <sub>10</sub> H <sub>10</sub> O <sub>4</sub>                | 194.1727      | Phenolic acids                       | <i>Phoenix<br/>canariensis<br/>leaves</i> | 6         |
| 7  | 3.55 | 271.1194 | Genistein                             | C <sub>15</sub> H <sub>10</sub> O <sub>5</sub>                | 270.1121      | Isoflavone                           | <i>Sabal</i> palm<br>seeds                | 7         |
| 8  | 5.4  | 271.3016 | Eestrone                              | C <sub>18</sub> H <sub>22</sub> O <sub>2</sub>                | 270.2943      | Steroid                              | <i>Phoenix<br/>dactylifera</i>            | 8         |
| 9  | 6.85 | 279.4756 | Linoleic acid                         | C <sub>18</sub> H <sub>32</sub> O <sub>2</sub>                | 280.4829      | Fatty acids                          | <i>S. serrulata</i>                       | 9         |
| 10 | 3.85 | 283.3031 | Oleic acid                            | C <sub>18</sub> H <sub>34</sub> O <sub>2</sub>                | 282.2958      | Fatty acids                          | <i>S. serrulata</i>                       | 9         |
| 11 | 2.75 | 287.1167 | Luteolin                              | C <sub>15</sub> H <sub>10</sub> O <sub>6</sub>                | 286.1094      | Flavone                              | <i>Plam; leaves<br/>seeds, fruits</i>     | 10        |
| 12 | 2.3  | 291.1486 | Catechin                              | C <sub>15</sub> H <sub>14</sub> O <sub>6</sub>                | 290.14141     | Flavanol<br>(hydroxyflavan)          | Plam seeds<br>fruits                      | 4         |
| 13 | 3.7  | 301.1357 | Chryseriol                            | C <sub>16</sub> H <sub>12</sub> O <sub>6</sub>                | 300.1266      | Flavone                              | Plam leaves<br>fruits                     | 11        |
| 14 | 3.18 | 305.1692 | Taxifolin                             | C <sub>15</sub> H <sub>12</sub> O <sub>7</sub>                | 304.1619      | Flavonols                            | Plam leaves                               | 11        |
| 15 | 3.77 | 331.1500 | Tricin                                | C <sub>17</sub> H <sub>14</sub> O <sub>7</sub>                | 330.1449      | <i>O</i> -methylated<br>flavone      | <i>Sabal</i> palm<br>seeds                | 1         |
| 16 | 4.74 | 332.3094 | Helasaoussazine                       | C <sub>19</sub> H <sub>13</sub> N <sub>4</sub> O <sub>2</sub> | 333.3167      | Alkaloid                             | <i>P. canariensis</i><br>palm             | 12        |
| 17 | 2.48 | 337.1639 | 3- <i>O</i> -Caffeoylshikimic<br>acid | C <sub>16</sub> H <sub>16</sub> O <sub>8</sub>                | 336.1566      | Phenolic acids                       | <i>Phoenix<br/>dactylifera</i>            | 13        |
| 18 | 3.18 | 411.3770 | Squalene                              | C <sub>30</sub> H <sub>50</sub>                               | 410.3675      | Triterpenes                          | <i>S.<br/>blackburniana</i>               | 14        |
| 19 | 4.18 | 413.3919 | Stigmasterol                          | C <sub>30</sub> H <sub>52</sub>                               | 412.3846      | Sterols                              | <i>Sabal</i> palm<br>seeds                | 7         |

|    |      |          |                                                            |                                                 |             |                                                                      |                                                   |        |
|----|------|----------|------------------------------------------------------------|-------------------------------------------------|-------------|----------------------------------------------------------------------|---------------------------------------------------|--------|
| 20 | 3.44 | 413.3925 | $\Delta^7$ -Avenesterol                                    | C <sub>29</sub> H <sub>48</sub> O               | 412.3853    | Sterols                                                              | <i>P. canariensis</i><br>palm                     | 15     |
| 21 | 5.57 | 415.4092 | Diosgenin                                                  | C <sub>27</sub> H <sub>42</sub> O <sub>3</sub>  | 414.4019    | Steroidal saponin                                                    | <i>Sabal</i> palm<br>seeds.                       | 7      |
| 22 | 5.59 | 415.4083 | $\beta$ -Sitosterol                                        | C <sub>29</sub> H <sub>50</sub> O               | 414.4011    | Sterol                                                               | <i>S. causiarum</i>                               | 16     |
| 23 | 6.64 | 427.3924 | Cycloartenol                                               | C <sub>30</sub> H <sub>50</sub> O               | 426.3851    | Pentacyclic<br>Triterpenoid                                          | <i>S. serrulata</i>                               | 17     |
| 24 | 2.78 | 433.2045 | Isovitexin                                                 | C <sub>21</sub> H <sub>20</sub> O <sub>10</sub> | 432.1972    | C-glucosyl flavone                                                   | <i>S.</i><br><i>blackbuniana.</i>                 | 18     |
| 25 | 2.54 | 449.2029 | Kaempferol-3-<br>glucoside                                 | C <sub>21</sub> H <sub>20</sub> O <sub>11</sub> | 448.1957    | O-glycosyl flavone.                                                  | <i>S. serrulata</i>                               | 19     |
| 26 | 2.66 | 449.2024 | Orientin                                                   | C <sub>21</sub> H <sub>20</sub> O <sub>11</sub> | 448.1951    | C-glycosyl flavone<br>.                                              | <i>S.</i><br><i>blackburniana</i>                 | 18     |
| 27 | 2.50 | 449.2030 | Luteolin 7-glucoside                                       | C <sub>21</sub> H <sub>20</sub> O <sub>11</sub> | 448.1957    | Glycosyloxy<br>flavone                                               | <i>Phoenix</i><br><i>loureirii.</i>               | 20     |
| 28 | 2.69 | 465.2020 | Isoquercetin                                               | C <sub>21</sub> H <sub>20</sub> O <sub>12</sub> | 464.1947    | Flavonol                                                             | <i>S. serrulata</i>                               | 19     |
| 29 | 6.03 | 469.5029 | Sablacaurin B                                              | C <sub>32</sub> H <sub>52</sub> O <sub>2</sub>  | 468.4954    | 19- Triterpenoid;<br>nor-3,4-seco-<br>Lanostane-Type                 | <i>S</i><br><i>blackburniana</i>                  | 14     |
| 30 | 5.7  | 459.4498 | 25-<br>Hydroperoxyycloart-<br>23-ene- 3 ol                 | C <sub>30</sub> H <sub>50</sub> O <sub>3</sub>  | 458.4425    | Triterpenoid                                                         | <i>Xanthosoma</i><br><i>robustum</i><br>(Araceae) | 21     |
| 31 | 5.9  | 481.4135 | Brassinolide                                               | C <sub>28</sub> H <sub>48</sub> O <sub>6</sub>  | 480.4062    | Steroid                                                              | <i>Phoenix</i><br><i>dactylifera</i>              | 8      |
| 32 | 3.04 | 493.2376 | Tricin 7- <i>O</i> - glucoside                             | C <sub>27</sub> H <sub>30</sub> O <sub>14</sub> | 492.2303    | Flavonoids                                                           | <i>Phoenix</i><br><i>Rupicola.</i>                | 20     |
| 33 | 6.15 | 569.521  | $\beta$ - Carotene<br>diepoxide.                           | C <sub>40</sub> H <sub>56</sub> O <sub>2</sub>  | 568.5137    | Tetraterpene; a<br>oxygenated<br>carotenoid.                         | <i>Ipomoea</i><br><i>batatas Lam</i>              | 22     |
| 34 | 8.72 | 579.2576 | Rhoifolin (Apigenin<br>7- <i>O</i> -<br>neohesperidoside). | C <sub>27</sub> H <sub>30</sub> O <sub>14</sub> | 578.2504    | <i>O</i> -Glycosyl flavone                                           | <i>S. serrulata</i>                               | 19     |
| 35 | 3.05 | 625.2084 | Isorhamnetin-3- <i>O</i> -<br>rutinoside                   | C <sub>28</sub> H <sub>32</sub> O <sub>16</sub> | 624.2012    | Flavonols                                                            | Plam leaves                                       | 23     |
| 36 | 3.02 | 747.1913 | Shimobashiric acid<br>D.                                   | C <sub>38</sub> H <sub>36</sub> O <sub>16</sub> | 748.1985483 | Neolignan.                                                           | <i>Keiskea</i><br><i>japonica</i>                 | 24     |
| 37 | 6.53 | 839.1739 | Tetra- <i>O</i> -<br>Caffeoylquinic acid                   | C <sub>43</sub> H <sub>36</sub> O <sub>18</sub> | 840.1812    | Polyphenol                                                           | <i>Pluchea</i><br><i>symphytifolia</i>            | 25     |
| 38 | 3.47 | 869.6766 | Dioscin                                                    | C <sub>45</sub> H <sub>72</sub> O <sub>16</sub> | 868.5971    | Steroidal saponin                                                    | <i>Phoenix</i><br><i>dactylifera</i>              | 23     |
| 39 | 3.02 | 897.0992 | Gallocatechin-<br>(4 $\alpha$ -8)]2-<br>catechin           | C <sub>45</sub> H <sub>38</sub> O <sub>20</sub> | 898.1065    | Condensed<br>tannins;<br>Polyphenol<br>(Flavonoids;<br>flavan-3-ols) | <i>Hordeum</i><br><i>vulgare</i>                  | 26, 27 |

|    |       |           |                 |                                                 |           |                       |                             |    |
|----|-------|-----------|-----------------|-------------------------------------------------|-----------|-----------------------|-----------------------------|----|
| 40 | 6.025 | 999.4723  | Bridgeside C1   | C <sub>49</sub> H <sub>74</sub> O <sub>21</sub> | 998.465   | Triterpenoid saponins | <i>Echinopsis macrogona</i> | 28 |
| 41 | 3.10  | 1048.7724 | Causiaroside II | C <sub>51</sub> H <sub>83</sub> O <sub>22</sub> | 1047.7651 | Steroidal saponin     | <i>S. causiarum</i>         | 20 |

## References

- 1) Mansouri A, Guendez E, Kokkalou E, Kefalas P., (2005). Phenolic profile and antioxidant activity of the Algerian ripe date palm fruit (*Phoenix dactylifera*). *Food Chemistry*, 89, 411–420.
- 2) Amira, E. A., Behija, S. E., Beligh, M., Lamia, L., Manel, I., Mohamed, H., et al. (2012). Effects of the ripening stage on phenolic profile, phytochemical composition and antioxidant activity of date palm fruit. *J. Agric. Food Chem*, 60:10896–902.
- 3) Luanratana, O., and W. J. Griffin. 1982. Alkaloids of *Duboisia hopwoodii*. *Phytochemistry* 21:449–51.
- 4) R Messaoudi, S Abbeddou, A Mansouri, A C. Calokerinos & P Kefalas. 2013. Phenolic Profile and Antioxidant Activity of Date-Pits of Seven Algerian Date Palm Fruit Varieties. *International Journal of Food Properties*, 08:29.
- 5) Benmeddour, Z., Mehinagic, E., Le Meurlay, D., and Louaileche, H. (2013). Phenolic composition and antioxidant capacities of ten Algerian date (*Phoenix dactylifera* L.) cultivars: a comparative study. *J. Funct. Food* 5, 346–354.
- 6) B Garcia, J. A Marco, E Seoane, A Tortajada 1981. Triterpenes, Waxes and Tricin in *Phoenix canariensis*. *J. Nat. Prod.*, 44, 1, 111–113.
- 7) Liu, L., Xiong, C., Zhu, Y., Zhou, H., and Ma, S. (2015). "The separation and anticancer activity of active monomers from *Sabal* palm seeds". Beijing Huagong Daxue Xuebao (Ziran Kexueban)/Journal of Beijing University of Chemical Technology (Natural Science Edition), 42 (6), pp. 78-83.
- 8) Zaki, A.K., Schmidt, J., Hammouda, F.M. and Adam, G. (1993). Steroid Constituents from Pollen Grain of *Phoenix dactylifera*. *Planta Medica*, 59, 613-614
- 9) Catchpole, O. J.; Perry, N. B.; da Silva, B. M. T.; Grey, J. B. and Smallfield, B. M. (2002). *J. of Supercritical fluids*, 22, 129- 138.
- 10) Hong, Y. J., Tomas-Barberan, F. A., Kader, A. A., and Mitchell, A. E. (2006). The flavonoid glycosides and procyanidin composition of deglet noor dates (*Phoenix dactylifera*). *J. Agric. Food Chem.* 54, 2405–2411.
- 11) Ouafi, S., Gaceb-Terrak, R., Bounaga, N., Lebreton, P 1988. Les flavonoides marqueurs intraspécifiques chez le palmier dattier (*Phoenix dactylifera* L.). - *Compt. rend. Acad. Sci. Paris, Sér.* III306: 399–404



- 12) S Hammami, H Jarraya, S Ben Salem, B Hamdi, A Ben Salah, P Devi, A Nefzi, Z Mighri. Isolation and structure elucidation of a novel alkaloid from *Phoenix canariensis* (C.) Palm tree. *Journal de la Société Chimique de Tunisie*, 2010, 12, 105-108
- 13) M A. Farag, M Mohsen R Heinke L A. Wessjohann 2014. Metabolomic fingerprints of 21 date palm fruit varieties from Egypt using UPLC/PDA/ESI–qTOF-MS and GC–MS analyzed by chemometrics. *Food Research International*. 64, 218-226.
- 14) El-Dib, R.; Kaloga, M.; Mahmoud, I.; Soliman, H.; Moharram, F. and Kolodziej, H. Sablaurin A and B, Two 19-nor3,4-seco-lanostane-type Triterpenoids from *Sabal causiarum* and *Sabal blackburniana*, Respectivly. *Phytochemistry*, 65(2004) 1153-1157.
- 15) I.Nehdi S. Omrib, M.I. Khalil S.I. Al-Resayes, 2010.Characteristics and chemical composition of date palm (*Phoenix canariensis*) seeds and seed oil. *Industrial Crops and Products*, 32, 3, 360-365
- 16) Yang, X.-H., Cai, Z.-Y., Cai, X., Xu, X.-J., Li, H.-J and Qin, Y., (2015). “Quality standard of *Sabal* fruit extract soft capsules”. *Chinese Journal of New Drugs*, 24 (24), 2854-2864.
- 17) Fabre, Pierre, S. A. Prostatitis inhibitors from *Sabal serrulata* fruits. *Jpn. Kokai Tokkyo Koho JP* .58 67,625.
- 18) Harborne, C. A. Williams, J. Greenham, and P. Moyna. (1974). Distribution of charged flavones and caffeylshikimic acid in Palmae. *Phytochemistry* 13:1557-1559.
- 19) Hiermann, A. (1989). “Content of *Sabal serrulata* fruits and their anti-inflammatory effect.” *Arch. Pharm(Weinheim)*, 322(2), 111-114.
- 20) Idaka, K., Hirai, Y., Shoji, J. Studies on the Constituents of Palmae Plants. IV.1a) The Constituents of the Leaves of *Sabal causiarum* Becc”. *Chemical and Pharmaceutical Bulletin*, 36 (5) (1988)1783-1790.
- 21) T Kato, B Frei Haller, M Heinrich, O Sticher,1996, Antibacterial hydroperoxysterols from *Xanthosoma Robustum*. *Phytochemistry*, 41(4):1191-5
- 22) Almeida-Muradian LB, Penteadó MVC.,1992. Carotenoids and provitamin A value of some Brazilian sweet potato cultivars (*Ipomoea batatas* Lam.). *Rev Farm Bioquim Univ Sao Paulo*;28:145-54.
- 23) Asami, Y. Hirai, J. Shoji, (1991). Studies on the constituents of Palmae plants. VI. Steroid saponins and flavonoids of leaves of *Phoenix canariensis* hort. ex Chabaud, *P. humilis* Royle var. *hanceana* Becc., *P. dactylifera* L and *Licuala spinosa* Wurm. *Chem Pharm. Bull*,39 2053-2056.
- 24) Murata T, Miyase T, Yoshizaki F (2012). Hyaluronidase inhibitors from *Keiskea japonica*. *Chem Pharm Bull* ,60:121–128
- 25) E. Scholz, M. Heinrich, and D. Hunkler 1994. Caffeylquinic Acids and Some Biological Activities of *Pluchea symphytifolia*. *Planta Medica* 60(4):360- 364.

- 26) Harborne, *The Handbook of Natural Flavonoids*, 2, (1999), 355, Flavans and proanthocyanidins L.B.
- 27) M. J. Brandon, L. Y. Foo, L. J. Porter, and P. Meredith, (1982). Proanthocyanidins of barley and sorghum; composition as a function of maturity of barley ears. *Phytochemistry*, 21, 2953.
- 28) S Okazaki, K Kinoshita, S Ito, K Koyama, H Yuasa, K Takahashi, 2011. Triterpenoid saponins from *Echinopsis macrogona* (Cactaceae). *Phytochemistry*, 72 (1), 136-146.
